# Supplementary material for: Early detection for elderly people with musculoskeletal aging related diseases based on artificial intelligence model
Source: Research Square preprint supplement (doi:10.21203/rs.3.rs-6124947/v1), 2025-04-16
Supplement: Supplementary file 1 [file 20e00833ad06804752bf3e7e.pdf]

# **Early detection for elderly people with musculoskeletal aging related diseases based on artificial intelligence model**

## **Supplementary materials**

### **TABLE OF CONTENTS**

|                                                                                                                          |          |
|--------------------------------------------------------------------------------------------------------------------------|----------|
| <b>Supplementary Table 1:</b> Multi-dimensions features included in this study                                           | <b>1</b> |
| <b>Supplementary Table 2:</b> The annotation of features selected by Logistic regression, LASSO regression and XGBoost   | <b>2</b> |
| <b>Supplementary Table 3:</b> The feature composition of binary-classification models and multiple-classification models | <b>3</b> |
| <b>Supplementary Table 4:</b> The baseline information of bone and muscle condition                                      | <b>4</b> |
| <b>Supplementary Table 5:</b> The baseline information of subjects between training dataset and testing dataset          | <b>5</b> |
| <b>Supplementary Table 6:</b> The performance of early detection models based on binary classification                   | <b>7</b> |

**Supplementary Table1** Multi-dimensions features included in this study

| Feature                                                            | Logistic | LASSO | Feature                                                                                                                               | Logistic | LASSO |
|--------------------------------------------------------------------|----------|-------|---------------------------------------------------------------------------------------------------------------------------------------|----------|-------|
| <b>Baseline</b>                                                    |          |       | How long have you participated in physical activity?                                                                                  |          |       |
| Age                                                                | ✓        |       | Have you plaed any sports in the past year?                                                                                           | ✓        | ✓     |
| Height                                                             |          | ✓     | Do you exercise less than 30 minutes a day?                                                                                           | ✓        | ✓     |
| Weight                                                             | ✓        |       | <b>EQ-5D</b>                                                                                                                          |          |       |
| Body mass index                                                    | ✓        | ✓     | Action capacity                                                                                                                       |          | ✓     |
| Systolic blood pressure                                            |          |       | The ability to take care of yourself                                                                                                  | ✓        |       |
| Diastolic blood pressure                                           |          |       | The ability to perform daily activities                                                                                               |          |       |
| Pulse pressure difference                                          |          |       | The degree of pain or discomfort                                                                                                      | ✓        | ✓     |
| Heart rate                                                         |          |       | The level of anxiety or depression                                                                                                    | ✓        |       |
| Marriage status                                                    |          |       | <b>Grouping feature</b>                                                                                                               |          |       |
| Education                                                          | ✓        |       | Grip                                                                                                                                  | ✓        | ✓     |
| Occupation type                                                    |          |       | Bone mineral density mean value                                                                                                       |          |       |
| Gender                                                             |          | ✓     | Bone mineral density T value                                                                                                          | ✓        | ✓     |
| How many people live together in your family?                      |          |       | Bone mineral density Z value                                                                                                          | ✓        | ✓     |
| Nation                                                             |          |       | Calf girth                                                                                                                            | ✓        | ✓     |
| <b>Cognitive function</b>                                          |          |       | SARC-F score                                                                                                                          | ✓        | ✓     |
| MoCA questionnaire-Visuospatial/executive                          | ✓        |       | SARC-F: The difficulty of lifting/carrying a weight of 4.5kg.                                                                         | ✓        |       |
| MoCA questionnaire-Naming                                          |          | ✓     | SARC-F: The difficulty of crossing the room on foot,                                                                                  | ✓        |       |
| MoCA questionnaire-Attention                                       |          |       | SARC-F: Difficulty getting up from a bed or chair.                                                                                    | ✓        |       |
| MoCA questionnaire-Language                                        |          |       | SARC-F: The difficulty of climbing stairs.                                                                                            | ✓        |       |
| MoCA questionnaire-Abstraction                                     |          |       | SARC-F: The number of falls in the past year.                                                                                         | ✓        | ✓     |
| MoCA questionnaire-Delayed recall                                  |          |       | Bone mineral density grouping                                                                                                         | ✓        |       |
| MoCA questionnaire-Orientation                                     |          |       | Calf girth grouping                                                                                                                   | ✓        | ✓     |
| MoCA score                                                         |          |       | Grip grouping                                                                                                                         | ✓        | ✓     |
| <b>Covid-19</b>                                                    |          |       | SARC-F grouping                                                                                                                       | ✓        | ✓     |
| Have you been infected with Covid-19?                              |          | ✓     | Bone condition based on bone mineral density results.                                                                                 | ✓        | ✓     |
| How many times have you been vaccinated against COVID-19?          | ✓        |       | Have you done any bone density examination?                                                                                           | ✓        | ✓     |
| How many times have you infected COVID-19?                         |          |       | <b>Lifestyle</b>                                                                                                                      |          |       |
| <b>Diet habit</b>                                                  |          |       | How often do you usually cook at home?                                                                                                | ✓        | ✓     |
| How much do you eat?                                               | ✓        | ✓     | The average time you spend indoors each day.                                                                                          | ✓        | ✓     |
| How often do you usually eat vegetables?                           | ✓        |       | How oftren do you use kitchen hood when you cook?                                                                                     | ✓        |       |
| How often do you usally eat fruits?                                | ✓        |       | How often do you participate in domestic work?                                                                                        | ✓        |       |
| How much do you eat meat per week?                                 | ✓        | ✓     | The floor you live on.                                                                                                                | ✓        |       |
| How often do you usally eat eggs?                                  |          |       | How often you climb up and down stairs (times/day)?                                                                                   | ✓        |       |
| How often do you usally drink milk?                                | ✓        | ✓     | How much time do you spend using mobile phones, tablets and other electronic devices every day?                                       | ✓        | ✓     |
| How often do you eat soybean products?                             | ✓        | ✓     | Is there a plastic bucket for daily drinking water?                                                                                   | ✓        | ✓     |
| How often do you eat seafood?                                      | ✓        |       | Does your home use indoor air improvement measures?                                                                                   | ✓        | ✓     |
| What kind of meat do you often eat?                                |          | ✓     | How often do you smoke indoors in your home?                                                                                          | ✓        | ✓     |
| <b>Disease history</b>                                             |          |       | Does your home often dry sweep the floor?                                                                                             | ✓        |       |
| Is there a risk of dementia?                                       |          |       | Do you often fry food in your home?                                                                                                   | ✓        | ✓     |
| Do you currently have a fracture?                                  |          |       | Have you ever smoking ?                                                                                                               | ✓        |       |
| Do you have high blood pressure?                                   |          |       | Do you smoke now?                                                                                                                     | ✓        | ✓     |
| Do you have diabetes?                                              |          | ✓     | Have you ever drinking?                                                                                                               | ✓        |       |
| Do you feel any pain in your back?                                 | ✓        | ✓     | Do you drink now?                                                                                                                     | ✓        | ✓     |
| Do you feel pain in your joints?                                   | ✓        |       | When was your house last renovated?                                                                                                   | ✓        |       |
| Do you feel hunched?                                               | ✓        |       | Tea drinking?                                                                                                                         | ✓        |       |
| Do you fall often or are you worried about falling?                | ✓        |       | Is there a plastic bucket for daily drinking water?                                                                                   |          | ✓     |
| Have you lost more than 4 cm in height since the age of 40?        | ✓        |       | Do you often drink drinks ?                                                                                                           | ✓        |       |
| Whether you have comorbidities?                                    |          |       | Work environment.                                                                                                                     |          |       |
| Wether combined with endocrine disease?                            |          |       | I often lose sleep because of the stress of work or life.                                                                             | ✓        |       |
| Whether combined with cardiac disease?                             |          |       | Do you have long periods of braking?                                                                                                  | ✓        |       |
| <b>Family history</b>                                              |          |       | Do you use air condition in your home in winter?                                                                                      | ✓        | ✓     |
| Family history of fracture, kyphosis, and osteoporosis in parents. |          |       | Do you spend less than minutes a day outdoors, such as less than minutes of sunlight exposure, and do not take vitamin D supplements? | ✓        | ✓     |
| <b>Oral health</b>                                                 |          |       | Do you regularly drink too much alcohol?                                                                                              | ✓        |       |
| Tooth loss                                                         |          |       | <b>Mental health</b>                                                                                                                  |          |       |
| Dental implant                                                     | ✓        | ✓     | Are you satisfied with yourself?                                                                                                      | ✓        |       |
| Dental decay                                                       | ✓        | ✓     | Are you satisfied with your relationships?                                                                                            | ✓        |       |
| How often do you brush your teeth?                                 | ✓        | ✓     | Do you agree or disagree with the statement that I am very satisfied with my life?                                                    | ✓        | ✓     |
| How often do your gums bleed?                                      | ✓        |       | Are you satisfied with the conditions in your place of residence?                                                                     | ✓        | ✓     |
| Do you have periodontal disease?                                   | ✓        |       | I love my family very much.                                                                                                           | ✓        | ✓     |
| When was your last oral exam?                                      | ✓        | ✓     | <b>Pharmacohistory</b>                                                                                                                |          |       |
| Have you had your teeth cleaned professionally recently?           | ✓        | ✓     | Whether calcium has been or is currently being used?                                                                                  | ✓        |       |
| Oral self-assessment?                                              | ✓        | ✓     | Do you use air condition in your home in summer?                                                                                      | ✓        |       |
| Do you have a denture in your mouth?                               |          | ✓     | Have you used or are currently using regular vitamin D?                                                                               | ✓        |       |
| Have you had a oral ulcer in the last month?                       | ✓        | ✓     | Whether active vitamin D has been or is currently being used?                                                                         | ✓        |       |
| Do you have regular oral check-ups?                                |          |       | Whether oral anti-osteoporosis drugs have been or are currently being used?                                                           | ✓        |       |
| <b>Physical activity</b>                                           |          |       | Have you used or are currently using injectable anti-osteoporosis drugs?                                                              | ✓        |       |
| How often do you participate in physical activity per year?        | ✓        |       | Wether other drugs have been or are currently being used?                                                                             | ✓        |       |
| Time per physical activity.                                        | ✓        | ✓     | Do you not take any calcium supplements and avoid dairy products or are you allergic to dairy products?                               | ✓        | ✓     |

**Supplementary Table2** The annotation of features selected by Logistic regression, LASSO regression and XGBoost

| Features                                                                                                                                                                                                                                  |
|-------------------------------------------------------------------------------------------------------------------------------------------------------------------------------------------------------------------------------------------|
| <b>Categorical features</b>                                                                                                                                                                                                               |
| <b>How often do you usually cook at home? (Cooking at home)</b><br>1=No cooking/occasionally; 2=once a day; 3=twice a day; 4=three times a day                                                                                            |
| <b>How often do you usally drink milk? (Drinking milk)</b><br>1= ≤ two times/week; 2= three~six times/week; 3= ≥seven times/week                                                                                                          |
| <b>How much time do you spend using mobile phones, tablets and other electronic devices every day? (Electronic device)</b><br>1=≤1 hour; 2=2-3 hours; 3=4-5 hours; 4=6-7 hours; 5=8-9 hours; 6=≥10 hours                                  |
| <b>Dental implant</b><br>0= none; 1=1 tooth; 2=2 teeth; 3= ≥3 teeth                                                                                                                                                                       |
| <b>Dental decay</b><br>0= none; 1=1~4 teeth; 2=5-10 teeth; 3= ≥11 teeth                                                                                                                                                                   |
| <b>Have you had your teeth cleaned by a professional dentist recently? (Professional oral cleaning)</b><br>1= never; 2= more than two years; 3= two years; 4= one year; 5= six months; 6= one month                                       |
| <b>The number of falls in the past year. (Falls in the past year)</b><br>0=0 times; 1= 1-3 times; 2=≥4 times                                                                                                                              |
| <b>Do you agree or disagree with the statement that I am very satisfied with my life? (Life satisfaction)</b><br>1= completely disagree; 2= disagree; 3= mildly disagree; 4= neither disagree nor agree; 5= mildly agree; 6=agree; 7=comp |
| <b>The degree of pain or discomfort</b><br>1= no pain or discomfort; 2= a little; 3= moderate; 4= severe                                                                                                                                  |
| <b>Calf girth grouping<sup>a</sup></b><br>0= normal; 1=abnormal                                                                                                                                                                           |
| <b>Grip grouping<sup>a</sup></b><br>0= normal; 1=abnormal                                                                                                                                                                                 |
| <b>SARC-F grouping<sup>a</sup></b><br>0= normal; 1=abnormal                                                                                                                                                                               |
| <b>Bone condition based on BMD results. (BMD)<sup>a</sup></b><br>0=normal; 1=osteoporosis/osteopenia                                                                                                                                      |
| <b>Does your home use indoor air improvement measures? (Indoor air improvement)</b><br>0=no;1=yes                                                                                                                                         |
| <b>Do you drink now? (Drinking)</b><br>0=no;1=yes                                                                                                                                                                                         |
| <b>Have you done any bone density examination? (Bone density examination)<sup>a</sup></b><br>0=no;1=yes                                                                                                                                   |
| <b>Numerical features</b>                                                                                                                                                                                                                 |
| <b>Body mass index (BMI)</b>                                                                                                                                                                                                              |
| <b>Grip<sup>a</sup></b>                                                                                                                                                                                                                   |
| <b>The average time you spend indoors each day. (Time spent indoors)</b>                                                                                                                                                                  |
| <b>Bone mineral density (BMD) T value<sup>a</sup></b>                                                                                                                                                                                     |
| <b>Calf girth<sup>a</sup></b>                                                                                                                                                                                                             |
| <b>SARC-F<sup>a</sup></b>                                                                                                                                                                                                                 |

<sup>a</sup>. these factors are the grouping features in this study.

**Supplementary Table3** The feature composition of binary-classification models and multiple-classification models.

| Model                          | General feature <sup>a</sup> | Grouping feature <sup>b</sup>                                              | Number of features |
|--------------------------------|------------------------------|----------------------------------------------------------------------------|--------------------|
| <b>Binary-classification</b>   |                              |                                                                            |                    |
| Model_1                        | All                          | All                                                                        | 22                 |
| Model_2                        | All                          |                                                                            | 13                 |
| Model_3                        | All                          | grip grouping                                                              | 14                 |
| Model_4                        | All                          | bone density examination                                                   | 14                 |
| Model_5                        | All                          | calf girth grouping                                                        | 14                 |
| Model_6                        | All                          | SARC-F grouping                                                            | 14                 |
| Model_7                        | All                          | bone mineral density                                                       | 14                 |
| Model_8                        | All                          | bone mineral density、calf girth grouping                                   | 15                 |
| Model_9                        | All                          | grip grouping、calf girth grouping、SARC-F grouping、bone density examination | 17                 |
| Model_10                       | All                          | grip grouping、calf girth grouping、SARC-F grouping、bone mineral density     | 17                 |
| <b>Multiple-classification</b> |                              |                                                                            |                    |
| Model_11                       | All                          | All                                                                        | 22                 |
| Model_12                       | All                          |                                                                            | 13                 |
| Model_13                       | All                          | grip grouping                                                              | 14                 |
| Model_14                       | All                          | bone density examination                                                   | 14                 |
| Model_15                       | All                          | calf girth grouping                                                        | 14                 |
| Model_16                       | All                          | SARC-F grouping                                                            | 14                 |
| Model_17                       | All                          | bone mineral density                                                       | 14                 |
| Model_18                       | All                          | bone mineral density、calf girth grouping                                   | 15                 |
| Model_19                       | All                          | grip grouping、calf girth grouping、SARC-F grouping、bone density examination | 17                 |
| Model_20                       | All                          | grip grouping、calf girth grouping、SARC-F grouping、bone mineral density     | 17                 |

<sup>a</sup>. General features included cooking at home, drinking milk, electronic devices use time, dental implant, dental decay, professional oral cleaning, falls in the past year, life satisfaction, the degree of pain or discomfort, indoor air improvement, drinking, body mass index and time spent indoors.

<sup>b</sup>. Grouping features included calf girth grouping, grip grouping, SARC-F grouping, bone mineral density, bone density examination, grip, bone mineral density T value, calf girth and SARC-F score.

**Supplementary Table 4** The baseline information of bone and muscle condition

| Features                              | Male       | Female     | Total      | <i>P</i> -value |
|---------------------------------------|------------|------------|------------|-----------------|
| <b>Calf girth grouping</b>            |            |            |            | ***             |
| Normal                                | 197        | 169        | 366        |                 |
| Abnormal                              | 80         | 141        | 221        |                 |
| <b>Griping grouping</b>               |            |            |            | ***             |
| Normal                                | 142        | 213        | 355        |                 |
| Abnormal                              | 153        | 98         | 251        |                 |
| <b>SARC-F grouping</b>                |            |            |            | 0.3031          |
| Normal                                | 287        | 301        | 588        |                 |
| Abnormal                              | 25         | 36         | 61         |                 |
| <b>Bone condition grouping</b>        |            |            |            | *               |
| Normal                                | 88         | 68         | 156        |                 |
| Osteoporosis / Osteopenia             | 39         | 58         | 97         |                 |
| <b>Muscle condition grouping</b>      |            |            |            | 0.1387          |
| Normal                                | 132        | 150        | 282        |                 |
| One index is abnormal                 | 123        | 132        | 255        |                 |
| Two indexes are abnormal              | 63         | 55         | 118        |                 |
| Three indexes are abnormal            | 3          | 11         | 14         |                 |
| <b>Bone-muscle condition grouping</b> |            |            |            | **              |
| Normal / unknown                      | 203        | 213        | 416        |                 |
| Bone or muscle abnormal               | 204        | 186        | 390        |                 |
| Bone and muscle abnormal              | 12         | 35         | 47         |                 |
| <b>Total</b>                          | <b>419</b> | <b>434</b> | <b>853</b> |                 |

"\*" indicated the *P*-value was less than 0.05, "\*\*\*" indicated the *P*-value was less than 0.01, "\*\*\*\*" indicated the *P*-value was less than 0.001.

**Supplementary Table5** The baseline information of subjects between training dataset and testing dataset

| Feature                                         | Training dataset<br>N=682 | Testing dataset<br>N=171 | <i>P</i> value |
|-------------------------------------------------|---------------------------|--------------------------|----------------|
| <b>Grip<sup>a</sup></b>                         | 25.66 ± 13.25             | 24.44 ± 15.61            | 0.35           |
| <b>Bone mineral density T value<sup>a</sup></b> | -1.01 ± 1.21              | -1.16 ± 1.01             | 0.64           |
| <b>Calf girth<sup>a</sup></b>                   | 34.71 ± 5.40              | 34.43 ± 6.68             | 0.06           |
| <b>Body mass index</b>                          | 24.71 ± 3.90              | 25.15 ± 4.86             | 0.56           |
| <b>Time spent indoors</b>                       | 12.51 ± 4.95              | 11.92 ± 5.20             | 0.16           |
| <b>SARC-F<sup>a</sup></b>                       |                           |                          | 0.19           |
| 0                                               | 362                       | 89                       |                |
| 1                                               | 182                       | 41                       |                |
| 2                                               | 49                        | 13                       |                |
| 3                                               | 24                        | 8                        |                |
| 4                                               | 24                        | 8                        |                |
| 5                                               | 22                        | 5                        |                |
| 6                                               | 14                        | 5                        |                |
| 7                                               | 5                         | 0                        |                |
| 8                                               | 0                         | 2                        |                |
| <b>Cook at home</b>                             |                           |                          | 0.31           |
| No cooking/occasionally                         | 145                       | 44                       |                |
| Once a day                                      | 71                        | 20                       |                |
| Twice a day                                     | 204                       | 54                       |                |
| Three times a day                               | 262                       | 53                       |                |
| <b>Drink milk</b>                               |                           |                          | 0.69           |
| ≤ two times/week                                | 242                       | 55                       |                |
| three to six times/week                         | 226                       | 58                       |                |
| ≥seven times/week                               | 214                       | 58                       |                |
| <b>Electronic devices use time</b>              |                           |                          | 0.24           |
| ≤ 1 hour                                        | 52                        | 12                       |                |
| 2-3 hours                                       | 160                       | 46                       |                |
| 4-5 hours                                       | 171                       | 36                       |                |
| 6-7 hours                                       | 146                       | 27                       |                |
| 8-9 hours                                       | 86                        | 26                       |                |
| ≥10 hours                                       | 67                        | 24                       |                |
| <b>Dental implant</b>                           |                           |                          | 0.07           |
| None                                            | 485                       | 104                      |                |
| 1-4 teeth                                       | 89                        | 31                       |                |
| 5-10 teeth                                      | 45                        | 17                       |                |
| ≥11 teeth                                       | 63                        | 19                       |                |
| <b>Dental decay</b>                             |                           |                          | 0.09           |
| None                                            | 433                       | 106                      |                |
| 1-4 teeth                                       | 104                       | 17                       |                |
| 5-10 teeth                                      | 11                        | 2                        |                |
| ≥11 teeth                                       | 134                       | 46                       |                |
| <b>Professional oral cleaning</b>               |                           |                          | 0.07           |
| Never                                           | 373                       | 74                       |                |
| More than two years                             | 60                        | 19                       |                |
| Two years                                       | 67                        | 21                       |                |
| One year                                        | 58                        | 13                       |                |
| Six months                                      | 72                        | 22                       |                |
| One month                                       | 52                        | 22                       |                |

|                                         |     |     |      |
|-----------------------------------------|-----|-----|------|
| <b>Falls in the past year</b>           |     |     | 0.30 |
| 0 times                                 | 365 | 94  |      |
| 1-3 times                               | 179 | 36  |      |
| ≥4 times                                | 138 | 41  |      |
| <b>Life satisfaction</b>                |     |     | 0.22 |
| Completely disagree                     | 137 | 48  |      |
| Disagree                                | 3   | 0   |      |
| Mildly disagree                         | 4   | 2   |      |
| Neither disagree nor agree              | 16  | 5   |      |
| Midly agree                             | 32  | 4   |      |
| Agree                                   | 271 | 62  |      |
| Completely agree                        | 219 | 50  |      |
| <b>The degree of pain or discomfort</b> |     |     | 0.06 |
| No pain or discomfort                   | 301 | 64  |      |
| A little                                | 69  | 11  |      |
| Moderate                                | 43  | 10  |      |
| Severe                                  | 269 | 86  |      |
| <b>Calf girth grouping</b>              |     |     | 0.54 |
| Normal                                  | 415 | 99  |      |
| Abnormal                                | 267 | 72  |      |
| <b>Grip grouping</b>                    |     |     | 0.29 |
| Normal                                  | 412 | 95  |      |
| Abnormal                                | 270 | 76  |      |
| <b>SARC-F grouping</b>                  |     |     | 1.00 |
| Normal                                  | 596 | 149 |      |
| Abnormal                                | 86  | 22  |      |
| <b>Bone mineral density</b>             |     |     | 0.76 |
| Normal                                  | 430 | 105 |      |
| Osteoporosis/osteopenia                 | 252 | 66  |      |
| <b>Indoor air improvement</b>           |     |     | 1.00 |
| No                                      | 555 | 139 |      |
| Yes                                     | 127 | 32  |      |
| <b>Drinking</b>                         |     |     | 0.43 |
| No                                      | 554 | 144 |      |
| Yes                                     | 128 | 27  |      |
| <b>Bone density examination</b>         |     |     | 0.41 |
| No                                      | 456 | 108 |      |
| Yes                                     | 226 | 63  |      |

**Supplementary Table6** The performance of early detection models based on binary classification

| No.      | Genral feature <sup>a</sup> | Grouping feature | Type     | Accuracy | AUC  | 95%CI         | Sensitivity | Specificity | 95%CI         |
|----------|-----------------------------|------------------|----------|----------|------|---------------|-------------|-------------|---------------|
| Model_1  | All                         | 9                | Training | 1.00     | 1.00 | -             | 1.00        | 1.00        | 0.9946-1.0000 |
|          |                             |                  | Testing  | 0.92     | 0.96 | 0.9333-0.9920 | 0.90        | 0.95        | 0.8735-0.9589 |
| Model_2  | All                         | 0                | Training | 0.96     | 0.99 | 0.9903-0.9974 | 0.93        | 0.99        | 0.9412-0.9725 |
|          |                             |                  | Testing  | 0.70     | 0.77 | 0.6985-0.8407 | 0.65        | 0.74        | 0.6211-0.7638 |
| Model_3  | All                         | 1                | Training | 0.99     | 1.00 | 0.9948-1.0000 | 0.98        | 0.99        | 0.9751-0.9939 |
|          |                             |                  | Testing  | 0.77     | 0.85 | 0.7913-0.9078 | 0.77        | 0.76        | 0.6954-0.8273 |
| Model_4  | All                         | 1                | Training | 0.97     | 1.00 | 0.9950-0.9993 | 0.94        | 0.99        | 0.9516-0.9797 |
|          |                             |                  | Testing  | 0.71     | 0.77 | 0.7031-0.8422 | 0.64        | 0.78        | 0.6333-0.7745 |
| Model_5  | All                         | 1                | Training | 0.99     | 1.00 | 0.9983-1.0000 | 0.99        | 0.99        | 0.9810-0.9968 |
|          |                             |                  | Testing  | 0.71     | 0.80 | 0.7332-0.8662 | 0.69        | 0.74        | 0.6394-0.7799 |
| Model_6  | All                         | 1                | Training | 0.96     | 0.99 | 0.9897-0.9974 | 0.92        | 0.99        | 0.9412-0.9725 |
|          |                             |                  | Testing  | 0.67     | 0.78 | 0.7052-0.8451 | 0.63        | 0.71        | 0.5907-0.7368 |
| Model_7  | All                         | 1                | Training | 0.97     | 1.00 | 0.9947-0.9993 | 0.94        | 0.99        | 0.9516-0.9797 |
|          |                             |                  | Testing  | 0.64     | 0.74 | 0.6614-0.8087 | 0.60        | 0.67        | 0.5606-0.7094 |
| Model_8  | All                         | 2                | Training | 0.99     | 1.00 | 0.9973-1.0000 | 0.99        | 0.99        | 0.9790-0.9959 |
|          |                             |                  | Testing  | 0.80     | 0.85 | 0.7928-0.9089 | 0.78        | 0.81        | 0.7270-0.8531 |
| Model_9  | All                         | 4                | Training | 1.00     | 1.00 | 0.9997-1.0000 | 1.00        | 1.00        | 0.9894-0.9996 |
|          |                             |                  | Testing  | 0.87     | 0.92 | 0.8756-0.9619 | 0.85        | 0.89        | 0.8117-0.9176 |
| Model_10 | All                         | 4                | Training | 1.00     | 1.00 | 0.9998-1.0000 | 1.00        | 1.00        | 0.9919-1.0000 |
|          |                             |                  | Testing  | 0.84     | 0.91 | 0.8629-0.9519 | 0.80        | 0.87        | 0.7721-0.8884 |

<sup>a</sup>. General features included cooking at home, drinking milk, electronic devices use time, dental implant, dental decay, professional oral cleaning, falls in the past year, life satisfaction, the degree of pain or discomfort, indoor air improvement, drinking, body mass index and time spent indoors.

<sup>b</sup>. Grouping features included calf girth grouping, grip grouping, SARC-F grouping, bone mineral density, bone density examination, grip, bone mineral density T value, calf girth and SARC-F score.
